# Supplementary material for: Simultaneous and sensitive determination of the main metabolites of the plasticizer DEHP and its substitutes DEHTP, DINCH and TEHTM in human urine by coupling of on-line SPE, UHPLC and tandem mass spectrometry
Source: Royal Society of Chemistry journal article supplement (doi:10.1039/d2ay01293f), 2022-01-01
Supplement: d2ay01293f1.pdf [file d2ay01293f1.pdf]

## Appendix A. Supplementary material

### TEHTM metabolites

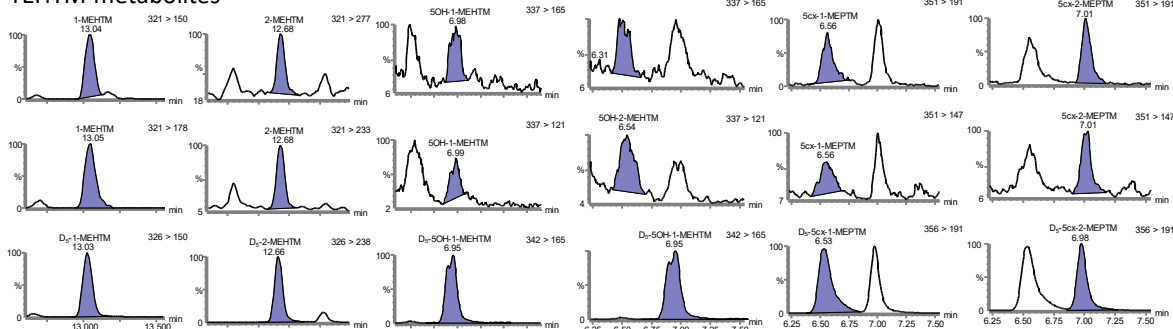

### DEHP metabolites

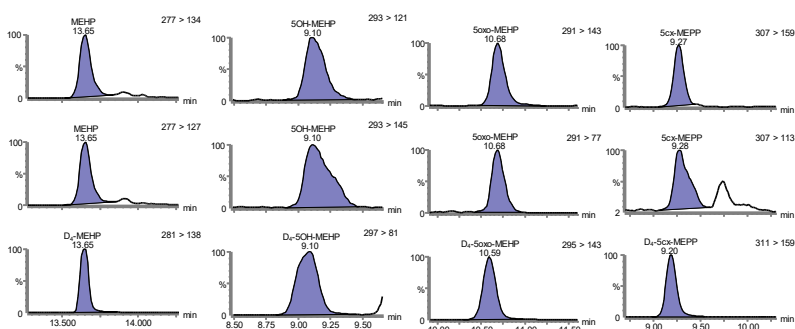

### DEHTP metabolites

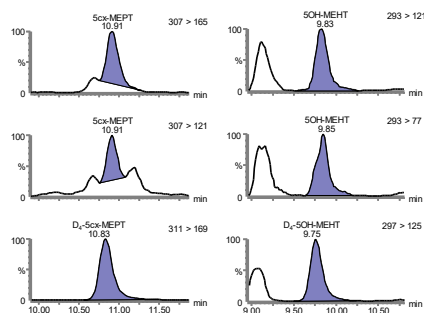

### DINCH metabolites

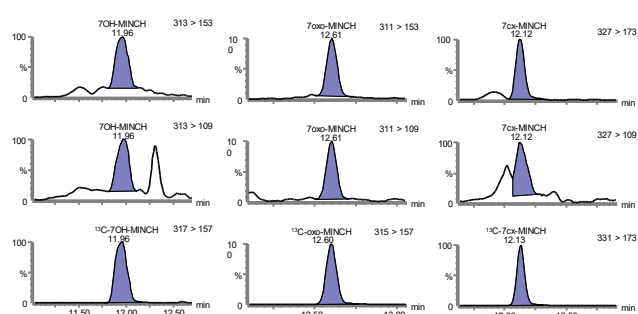

Supplemental Figure 1: Chromatograms of a spiked urine sample (lowest calibration standard) with the following spiked analyte levels: 0.1 µg/L each for all TEHTM metabolites, 0.2 µg/L each for all other analytes.
